# Supplementary material
Source: Research Square preprint supplement (doi:10.21203/rs.3.rs-8999012/v1)

Supplementary Figure

Supplementary Fig.1 ROC curves of the hub genes. (A) ROC curves of CRAT. (B) ROC curves of AGPAT1. (C) ROC curves of PEX11A .(D) ROC curves of APOC1. (E) ROC curves of TMPRSS11E. (F) ROC curves of INSIG1. (G) ROC curves of ACSL1. (H) ROC curves of FBP1. (I) ROC curves of MGST1.


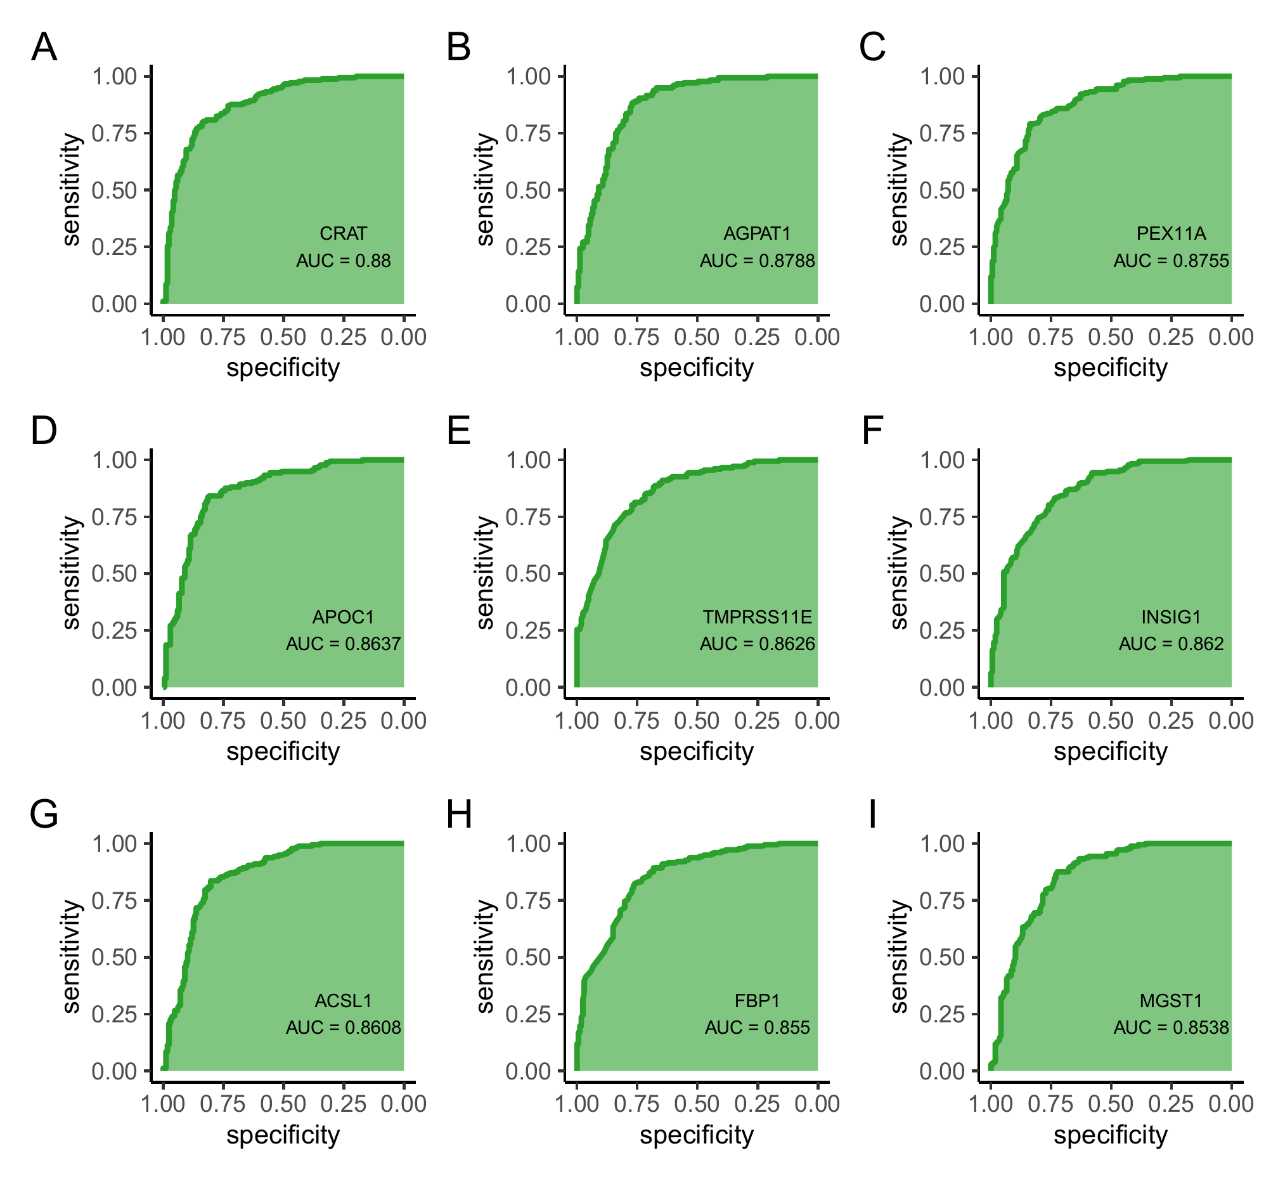

Supplement: Supplementary file 1 [file 5f423a88bac7320197687b3a.docx]
